# Supplementary material for: Diabetic retinopathy: could the alpha-1 antitrypsin be a therapeutic option?
Source: PubMed Central journal article supplement (PMC4335423; doi:10.1186/0717-6287-47-58), 2014-11-18
Supplement: 40659_2014_69_MOESM2_ESM.pdf [file 40659_2014_69_MOESM2_ESM.pdf]

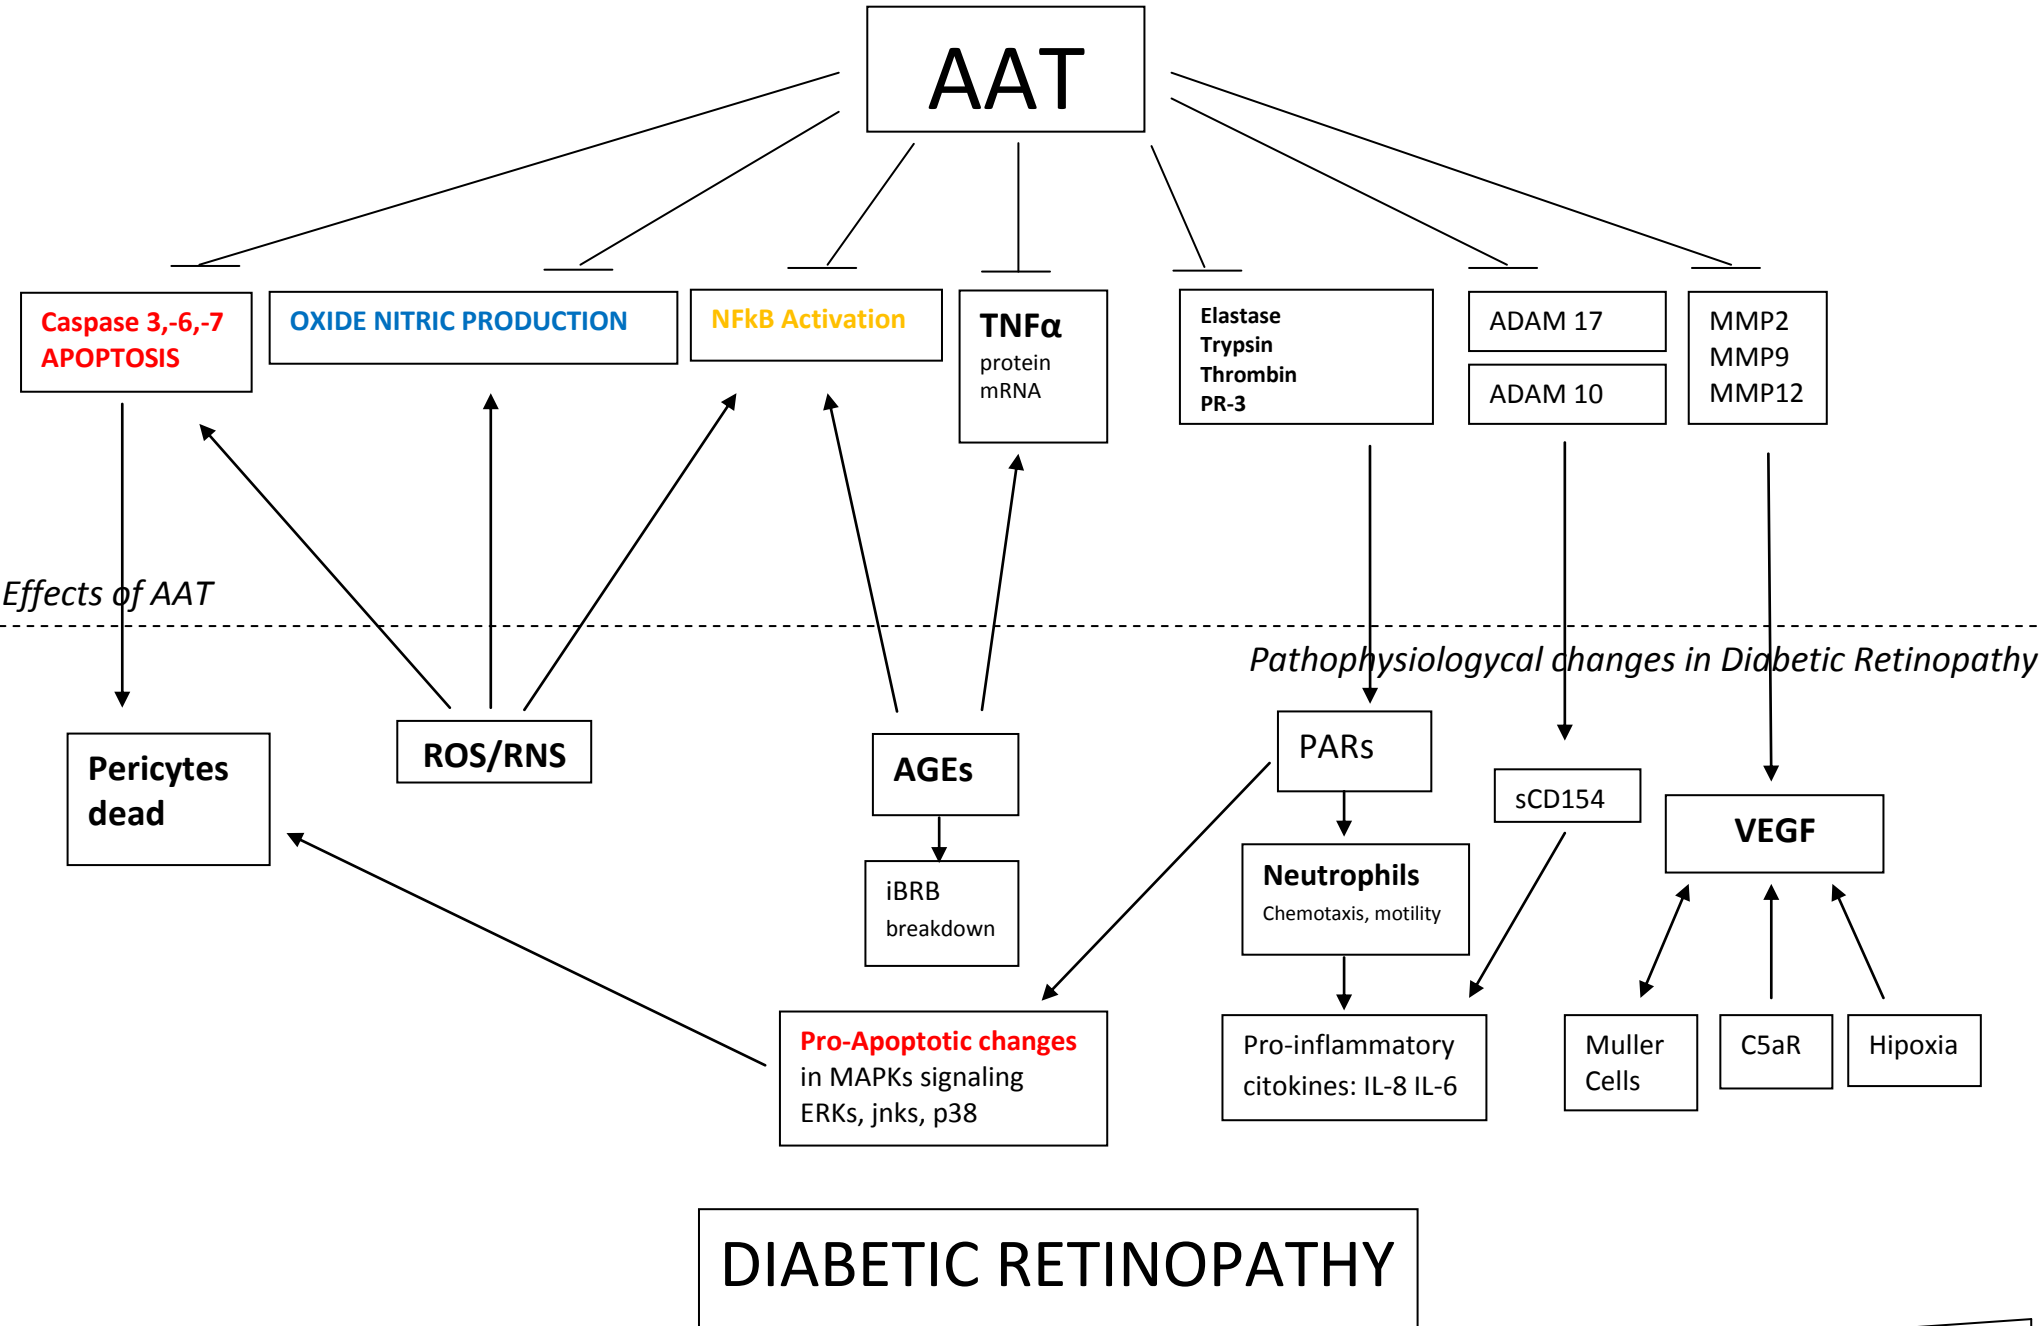

*Effects of AAT*

*Pathophysiological changes in Diabetic Retinopathy*

**DIABETIC RETINOPATHY**

*Timeline*
